# Supplementary material for: Copper(ii) binding to flexible triethanolamine-core PAMAM dendrimers: a combined experimental/in silico approach
Source: Royal Society of Chemistry journal article supplement (doi:10.1039/c3cp54005g), 2013-11-04
Supplement: c3cp54005g.pdf [file c3cp54005g.pdf]

## Supporting Information

### Copper(II) binding to flexible triethanolamine-core PAMAM dendrimers: a combined experimental/*in silico* approach

Maria Francesca Ottaviani<sup>†,\*</sup>, Michela Cangiotti,<sup>†</sup> Alberto Fattori,<sup>†</sup> Concetta Coppola,<sup>†</sup> Paola Posocco,<sup>‡,§</sup> Erik Laurini,<sup>‡</sup> Xiaoxuan Liu,<sup>#</sup> Cheng Liu,<sup>#</sup> Maurizio Fermeglia,<sup>‡</sup> Ling Peng,<sup>#,\*</sup> and Sabrina Pricl,<sup>‡,§,\*</sup>

<sup>†</sup>Department of Earth, Life and Environment Sciences, University of Urbino, Località Crocicchia, 61029 Urbino, Italy

<sup>‡</sup>Molecular Simulation Engineering (MOSE) Laboratory, Department of Engineering and Architecture (DEA), University of Trieste, 34127 Trieste, Italy

<sup>§</sup>National Interuniversity Consortium for Material Science and Technology (INSTM), Research Unit MOSE-DEA, University of Trieste, 34127 Trieste, Italy

<sup>#</sup>Aix-Marseille Université, Centre Interdisciplinaire de Nanoscience de Marseille, CNRS UMR 7325, 13288 Marseille, France

### Table of Contents

|                |   |
|----------------|---|
| Figure S1..... | 2 |
| Figure S2..... | 2 |
| Figure S3..... | 3 |
| Figure S4..... | 3 |
| Figure S5..... | 4 |

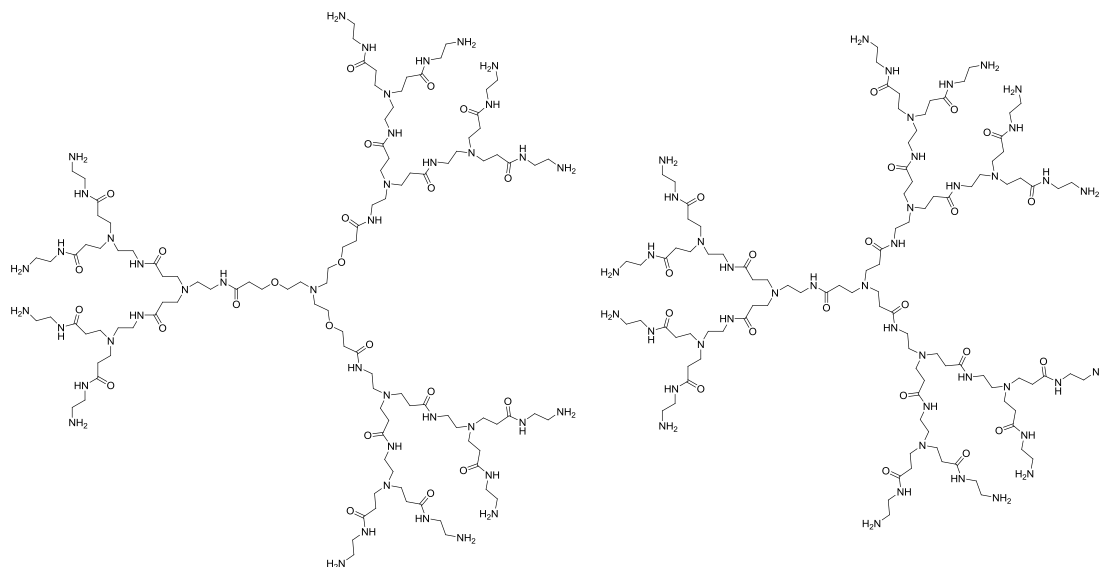

**Figure S1.** Structurally flexible triethanolamine (TEA)-core PAMAM dendrimer (left) and traditional amine (NH<sub>3</sub>) core PAMAM dendrimer (right) of generation 2.

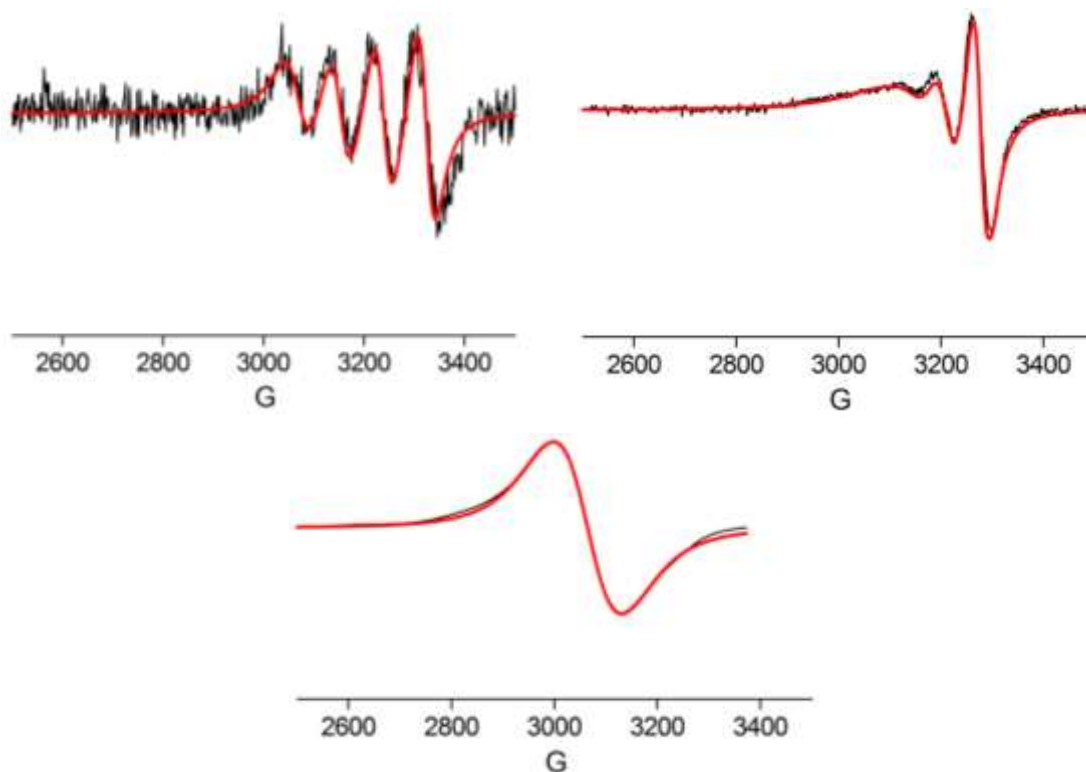

**Figure S2.** Experimental (black) and calculated (red) EPR signal 1 (top left), signal 2 (top right) and signal 3 (bottom) for TEA-core PAMAM dendrimer G2 at 298K. The parameters used in spectra calculations were the following: Signal 1: [Cu(II)] = 0.0025 M;  $g_{xx} = 2.055$ ;  $g_{yy} = 2.06$ ;  $g_{zz} = 2.231$ ,  $A_{xx} = 30$  G;  $A_{yy} = 35$  G;  $A_{zz} = 190$  G;  $\tau = 42$  ps; Signal 2: [Cu(II)] = 0.05 M;  $g_{xx} = 2.062$ ;  $g_{yy} = 2.09$ ;  $g_{zz} = 2.300$ ,  $A_{xx} = 25$  G;  $A_{yy} = 25$  G;  $A_{zz} = 159$  G;  $\tau = 0.2$  ns; Signal 3: [Cu(II)] = 0.5 M;  $g_{xx} = 2.07$ ;  $g_{yy} = 2.07$ ;  $g_{zz} = 2.28$ ,  $A_{xx} = 5$  G;  $A_{yy} = 5$  G;  $A_{zz} = 125$  G;  $\tau = 0.07$  ns; Heisenberg exchange frequency,

$$W_{\text{ex}}=1 \times 10^8 \text{ s}^{-1}.$$

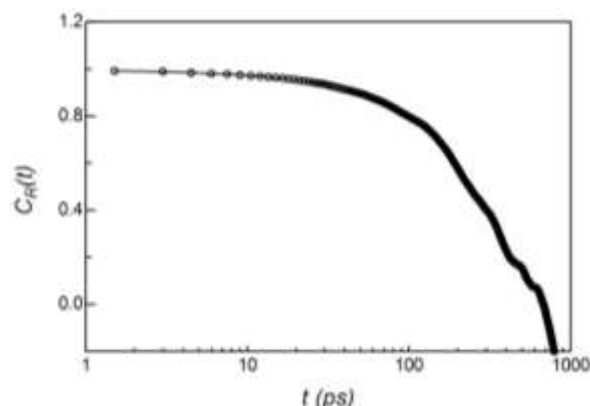

**Figure S3.** Autocorrelation function  $C_R(t)$  of the squared radius of gyration for the G2/Cu<sup>2+</sup> complex.  $C_R(t)$  is given by the following relationship:  $C_R(t) = \frac{\langle (R^2(t) - \langle R^2 \rangle)(R^2(0) - \langle R^2 \rangle) \rangle}{\langle R^4 \rangle - \langle R^2 \rangle^2}$ . The corresponding relaxation time is the time at which  $C_R(t) = 1/e$ . For this complex, the estimated relaxation time is 0.32 ns. This value has several, important implications: 1) it is quite small, implying a high mobility/flexibility of the corresponding dendrimeric structure, 2) it is exceedingly small comparable with the overall simulation time, meaning that the trajectory of the relevant molecular complex sampled enough independent configurations for sufficient averaging of the structural properties, and 3) it is comparable to the correlation time obtained from EPR for the same complex.

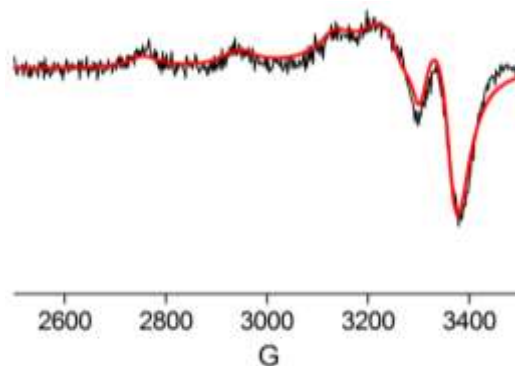

**Figure S4.** Experimental (black) and calculated (red) EPR signal 1 for TEA-core PAMAM dendrimer G2 at 150K. The parameters used in spectra calculation were the following: [Cu(II)] = 0.0025 M;  $g_{xx} = 2.055$ ;  $g_{yy} = 2.06$ ;  $g_{zz} = 2.231$ ,  $A_{xx} = 30$  G;  $A_{yy} = 35$  G;  $A_{zz} = 190$  G;  $\tau = 17$  ns.

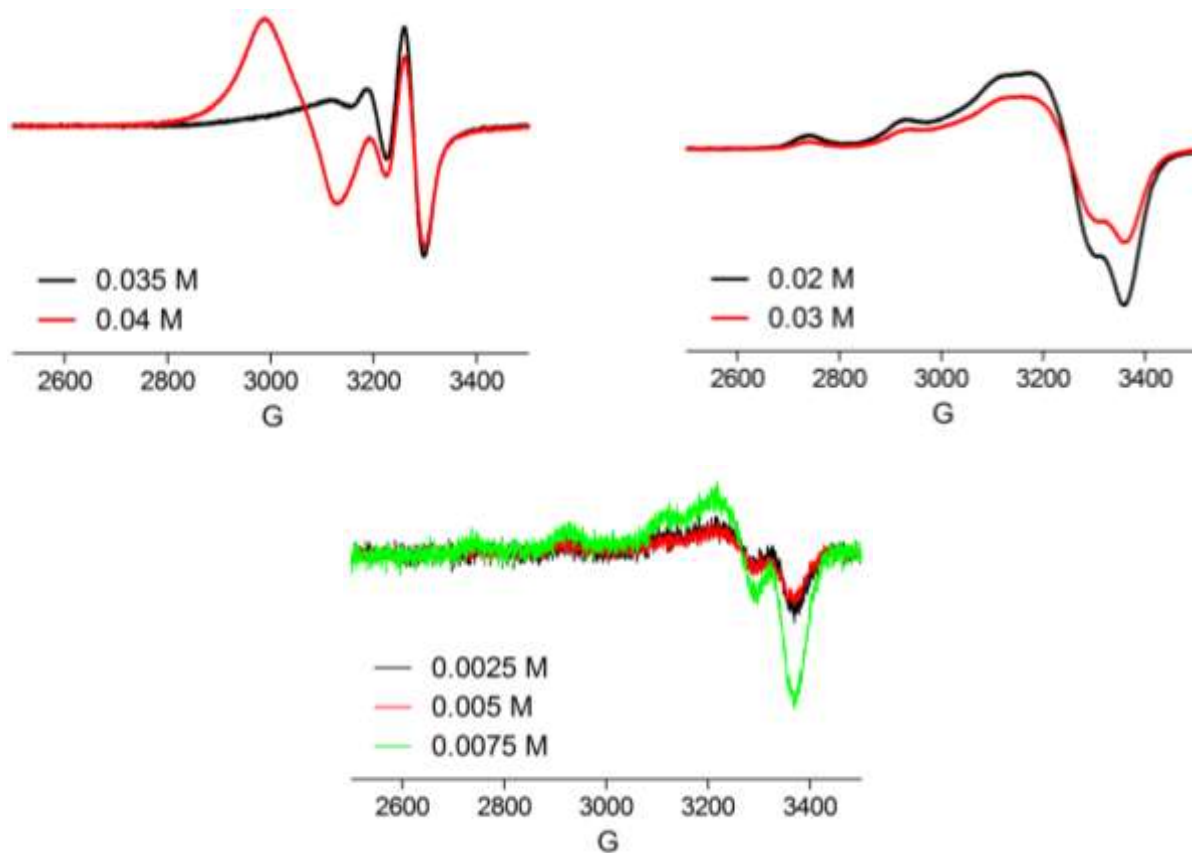

**Figure S5.** EPR experimental spectra for G0 at 298 K (top, left), G1 at 150 K (top, right) and G3 at 150 K (bottom) at Cu(II) concentrations corresponding to a  $\text{Cu}^{2+}$ /dendrimer molar ratio  $\cong 1$ .
